# Supplementary material for: Multilevel barriers and facilitators of shared decision-making in chronic illness management: a Social ecological model approach
Source: Research Square preprint supplement (doi:10.21203/rs.3.rs-7599043/v1), 2025-10-31
Supplement: Supplementary file 1 [file 7329bdef01286e1f835047f5.docx]

**Appendix**

Appendix Table 1. Patient Medical History and Treatment Frequency

| **Participant ID** |  | **Age**  **group** | Diagnosis period | **Disease** | **Frequency of Hospital Visits for the Diagnosed Condition** |
| --- | --- | --- | --- | --- | --- |
| P1 |  | early 60s | early 2010s | Hypertension | Every 6 months at a tertiary hospital |
| P2 |  | early 70s | early 1990s | Hypertension | Every 6 months at a tertiary hospital |
| P 3 |  | mid-50s | mid-2010s | Hypertension | Every 6 months at a secondary hospital |
| P 4 |  | late 50s | early 2020s | Hypertension | Every 4 months at a secondary hospital |
| P 5 |  | early 50s | late 2000s | Diabetes | Every 3 months at a tertiary hospital |
| P 6 |  | mid-40s | mid-2010s | Diabetes | Every 2 months at a secondary hospital |
| P 7 |  | early 50s | early 2020s | Diabetes | Every 3 months at a local clinic |
| P 8 |  | early 60s | late 2010s | Diabetes | Every 3 months at a local clinic |
| P 9 |  | late 20s | early 2010s | Heart disease | Every 6 months at a secondary hospital |
| P 10 |  | mid-20s | late 1990s | Heart disease | Every 6 months at a secondary hospital |
| P 11 |  | late 40s | Diagnosed with glomerulonephritis in the early 2010s and started hemodialysis in the early 2020s | kidney disease: dialysis | Every month at a secondary hospital  Hemodialysis three times a week (local clinic) |
| P 12 |  | late 40s | Diagnosed with chronic kidney failure in the late 2000s and started peritoneal dialysis in the early 2020s | kidney disease: dialysis | A tertiary hospital once every six weeks,  Peritoneal dialysis at home three times a day. |
| P 13 |  | late 60s | Diagnosed with aortic regurgitation in the late 2010s and underwent prosthetic heart valve surgery in the early 2020s | Heart disease | Every month at a tertiary hospital |
| P 14 |  | mid-40s | Diagnosed with glomerulonephritis in the late 2010s and started hemodialysis in the early 2020s | kidney disease: dialysis | Every month at a secondary hospital  Hemodialysis three times a week (secondary hospital) |
| P 15 |  | late 40s | Diagnosed with arrhythmia in the early 2020s | Heart disease | A tertiary hospital once a year |
| P 16 |  | late 60s | Diagnosed with glomerulonephritis in the early 2000s and started hemodialysis in the early 2020s | kidney disease: dialysis | Every month at a tertiary hospital  Hemodialysis three times a week (local clinic) |

**Note.** Both age groups and diagnosis periods were anonymized and reported in decade ranges. Subcategories were defined as follows: early = 0–4 years, mid = 5–6 years, and late = 7–9 years of the decade (e.g., early 2010s, mid-2010s, early 2020s). Sex information was omitted to protect participant anonymity
