# Supplementary material for: Multilevel barriers and facilitators of shared decision-making in chronic illness management: a Social ecological model approach
Source: Research Square preprint supplement (doi:10.21203/rs.3.rs-7599043/v1), 2025-10-31
Supplement: Supplementary file 2 [file c10a3483da362a03fc4d3403.docx]

**Supplementary File 1. Semi-Structured Interview Guide (English Version)**

**Description:**
This semi-structured interview guide was developed specifically for this study to explore multilevel factors influencing shared decision-making (SDM) in chronic illness care. Questions were organized according to the Social Ecological Model (SEM): individual, interactional, hospital, and societal levels.

**1. Individual Level**

- How would you describe your current health status? Do you feel that you are managing your health well?
- In what year were you diagnosed with this chronic condition?
- Before your diagnosis, were you aware of this condition?
- How did you feel when you were first diagnosed? What were your initial thoughts?
- Since your diagnosis, where do you primarily obtain information about your treatment? Do you feel you have sufficient information about your condition?
- Are you satisfied with the health decisions you have made?
- Do you feel you have a sufficient understanding of the information regarding your condition?
- How much interest do you have in being involved in decisions related to your health condition?

**2. Interactional Context**

- Who first diagnosed you, and how was the diagnosis delivered?
  - What was the communication with your physician like?
  - How much do you trust your physician? How well do you feel you know them?
- Regarding your ongoing treatments, how, how much, and how sufficiently did the healthcare team (e.g., physicians, nurses) explain them? Were there any particularly positive or challenging aspects of your communication with the healthcare team?
  - Did you receive explanations from the healthcare team about medical terminology, tests, or procedures?
  - Were you provided with information about medication administration, potential side effects, and other related details?
- Where, with whom, and how did you decide to begin your first treatment?
  - *Probes:* Was the decision made in a private space? Was there sufficient time?
- During your regular treatments, how freely have you been able to express your opinions to your physician or other healthcare professionals?
- If you had worries or concerns about your symptoms or treatment plan, to what extent were you able to communicate them to your physician or nurse?
- Do you feel that you were presented with sufficient options to make your decision? How confident are you in the decision you made?
- On a scale of 0 (no control) to 10 (complete control), how much control did you feel you had over the decision? Who else held control, and to what degree?
- When making a significant decision about your treatment in the past, whose opinion was most important to you?
- If you have to make a significant decision about your health or treatment in the future, whose opinion do you think will be most important?
- Whom do you primarily discuss your chronic condition with and receive information from? Does the opinion of this person (or people) influence your medical decisions?
- Have you experienced any complications related to your condition?
  - How did the decision-making process differ between your initial diagnosis and when you had to decide on a new treatment due to complications?

**3. Hospital Context**

- How often do you visit the hospital for your treatment? What are your thoughts or feelings when you go to the hospital?
- Have you received any informational materials from the hospital regarding your condition (e.g., medication management, precautions, exercise, dietary guidance)?
- In your experience with scheduling appointments and receiving care, do you feel the hospital's healthcare team provides sufficient explanations and presents adequate choices for decision-making? Why or why not?
- If the hospital has patient support groups, are you involved in any? What kind of support do they provide?

**4. Societal Context**

- In Korean society, what do you perceive as the conventional role of a patient?
- In Korean society, what do you perceive as the conventional role of a physician?
- In Korean society, what do you perceive as the conventional role of a nurse?
- What are your thoughts on the societal and governmental support available for patients with chronic conditions?

**5. Concluding Remarks**

- What improvements could be made to foster more active dialogue between patients and physicians and to promote greater patient involvement in decision-making?
- What do you find most challenging when communicating with physicians or the healthcare team?
- Do you have any suggestions or requests for your physician, the healthcare team, or the hospital?
- Is there anything else you would like to add that we have not covered?
